# Supplementary material for: An Intronic Variant of CHD7 Identified in Autism Patients Interferes with Neuronal Differentiation and Development
Source: PubMed Central journal article supplement (PMC8353028; doi:10.1007/s12264-021-00685-w), 2021-05-04
Supplement: 12264_2021_685_MOESM1_ESM.pdf [file 12264_2021_685_MOESM1_ESM.pdf]

## Supplementary Materials

### Supplementary Figures

**A**

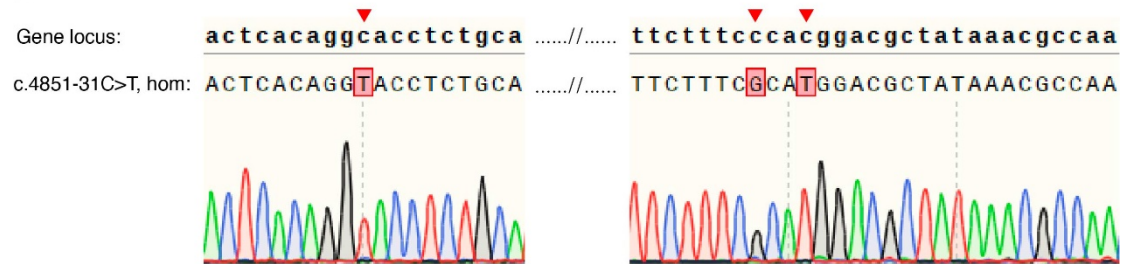

**B**

| Sequence             | PAM | Score    | Chromosome | Strand | Position  | Mismatches |
|----------------------|-----|----------|------------|--------|-----------|------------|
| TTGGAGTAAAAGCGTCCTT  | GAG | 0.193167 | chr5       | 1      | 7081648   | 4          |
| TTGTCTTTTATAGCGTCCTA | AGG | 0.173688 | chr2       | -1     | 117679569 | 4          |
| TTGGGGTTTAAGGCCTCCGT | AGG | 0.116908 | chr6       | -1     | 100455661 | 4          |
| TTGGCGTTCCAGCGTCCCC  | CAG | 0.114448 | chr1       | 1      | 1986592   | 4          |
| TTGGCCTTACTGCGTCCTT  | GGG | 0.090433 | chr1       | 1      | 93722298  | 4          |

**Fig. S1** Identification of cell lines with point mutation. **A** Sequencing of cell lines carrying homozygous mutants of hESCs (red arrowheads, introduced mutant bases). **B** Predicted high-risk off-target sites to be validated. PAM, protospacer adjacent motif.

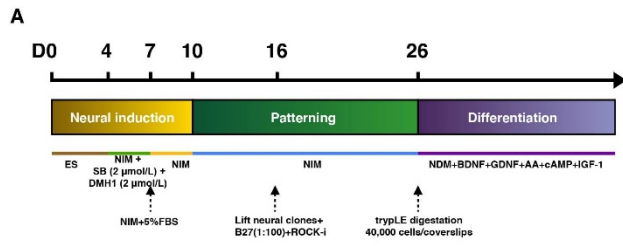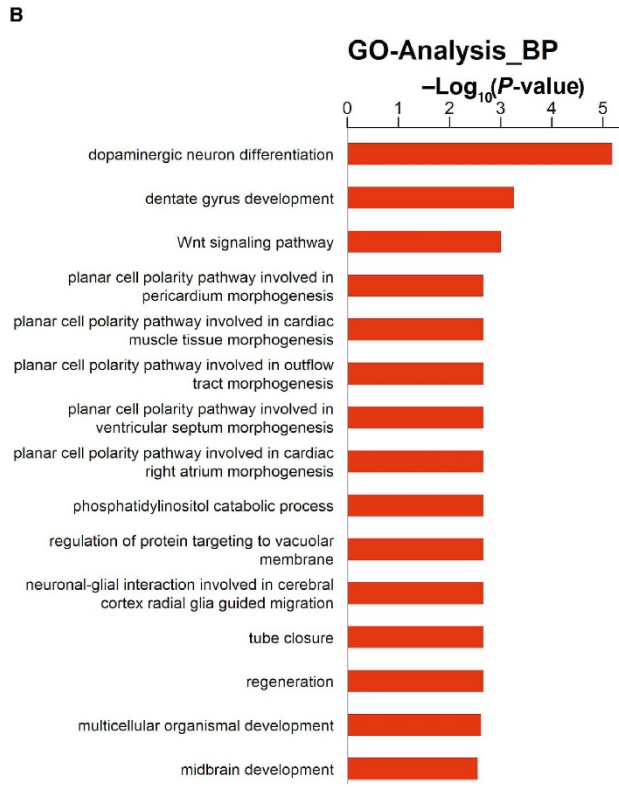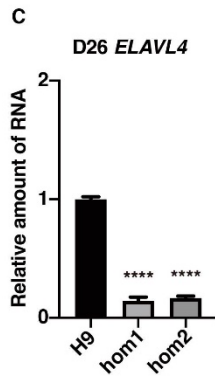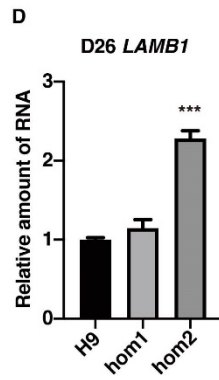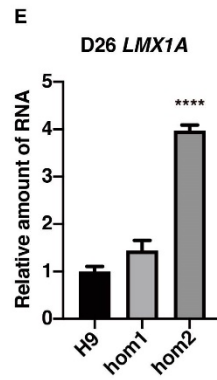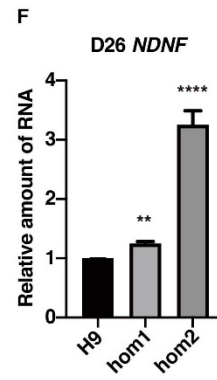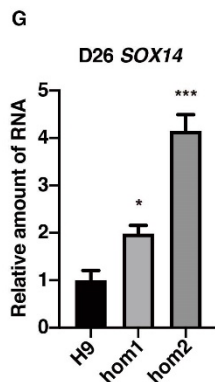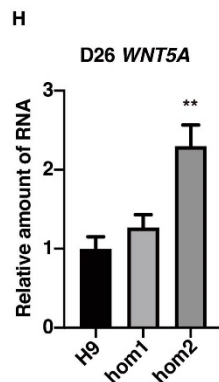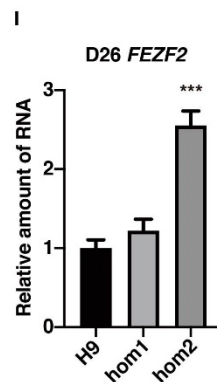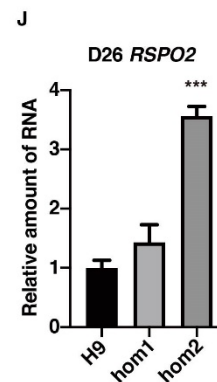

**Fig. S2** Effect of intronic variation of *CHD7* on biological processes during differentiation. **A** Timeline of differentiation of hESCs to dorsal forebrain glutamate neurons (ES, human embryonic stem cell; NIM, neural induction medium; SB, TGF- $\beta$ /Smad inhibitor SB-431542; DMH1, BMP inhibitor dorsomorphin homologue 1; ROCK-i, ROCK pathway inhibitor; NDM, neural differentiation medium; AA, ascorbic acid). **B** Gene Ontology Biological Process analysis of genes regulated in differentiated neural precursor hom1 and hom2 cells compared to H9 controls on D26 [GO terms with Benjamini-adjusted  $P$ -values  $<0.05$  (Fisher's exact test)]. **C–J** mRNA levels assessed by RT-qPCR for genes closely related to neural differentiation and development identified in RNAseq in cell lines carrying homozygous mutants on D26. Value represents the mean  $\pm$  SEM ( $n = 3$ ,  $*P < 0.05$ ,  $**P < 0.01$ ,  $***P < 0.001$ ,  $****P < 0.0001$ ;  $t$ -test).

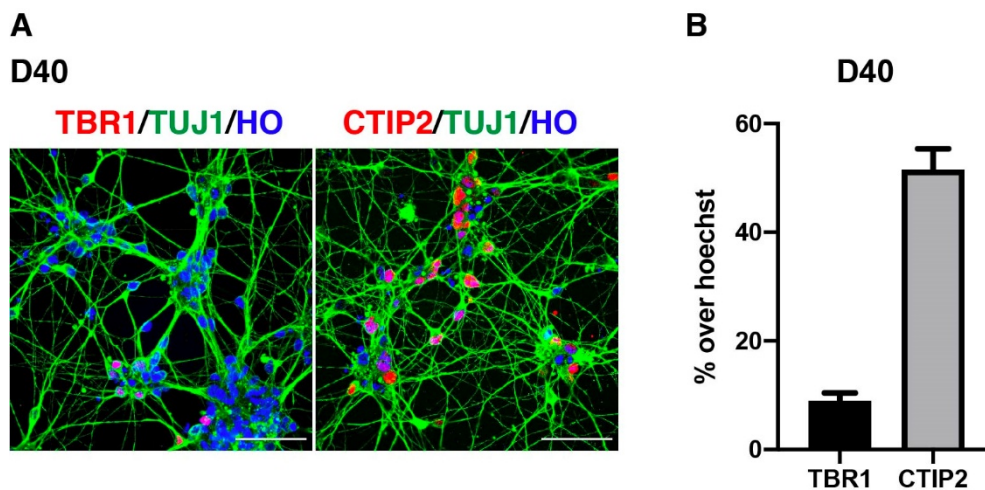

**Fig. S3** Identification of differentiated neurons. **A** Representative images of differentiated H9 neurons on D40 co-immunostained for regionalization markers of the dorsal forebrain (TBR1 and CTIP2) with TUJ1 and Hoechst (HO) (scale bars, 50  $\mu$ m). **B** Percentage of total cells expressing neuronal regionalization markers from D40 of differentiation (~300 cells in 8 fields were analyzed for each group).

**A**

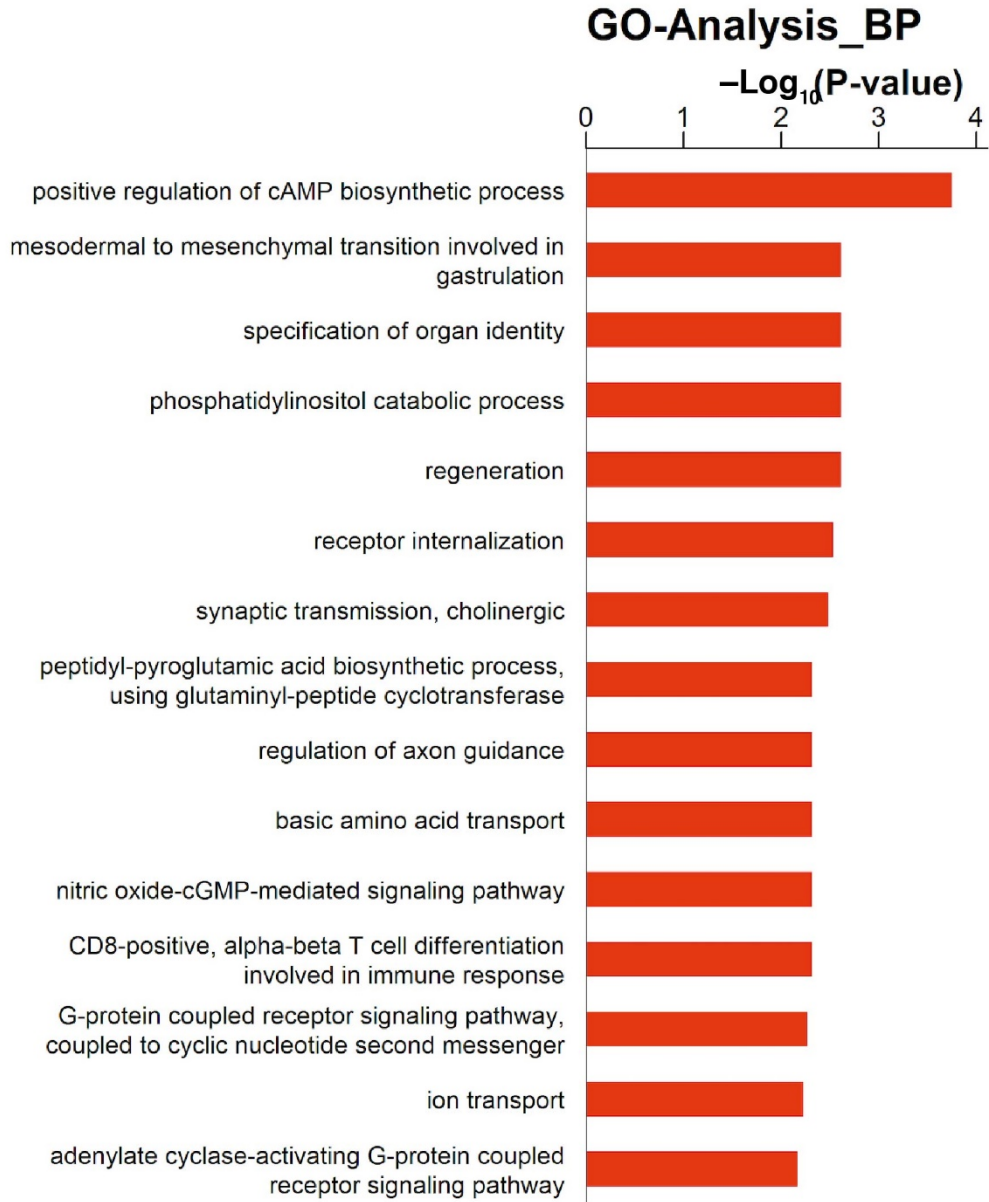

**B**

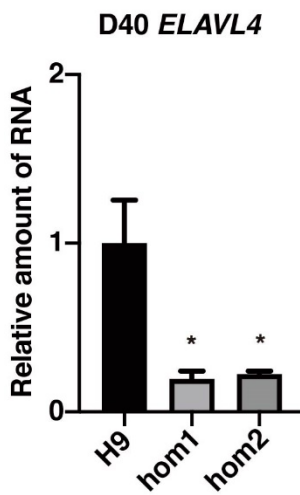

**C**

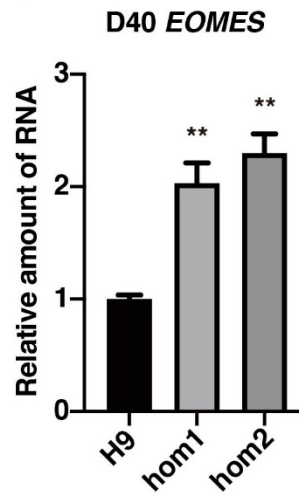

**Fig. S4** Effect of intronic variation of *CHD7* on biological processes during neurodevelopment. **A** Gene Ontology Biological Process analysis of genes regulated in differentiated hom1 and hom2 neurons compared to H9 controls on D40 [GO terms with Benjamini adjusted  $P$ -values  $< 0.05$  (Fisher's exact test)]. **B, C** mRNA levels assessed by RT-PCR for genes closely related to neural differentiation and development identified in RNAseq in cell lines carrying homozygous mutants (hom1 and hom2) on D40. Values represent the mean  $\pm$  SEM ( $n = 3$ ,  $*P < 0.05$ ,  $**P < 0.01$ ,  $***P < 0.001$ ,  $****P < 0.0001$ ;  $t$ -test).

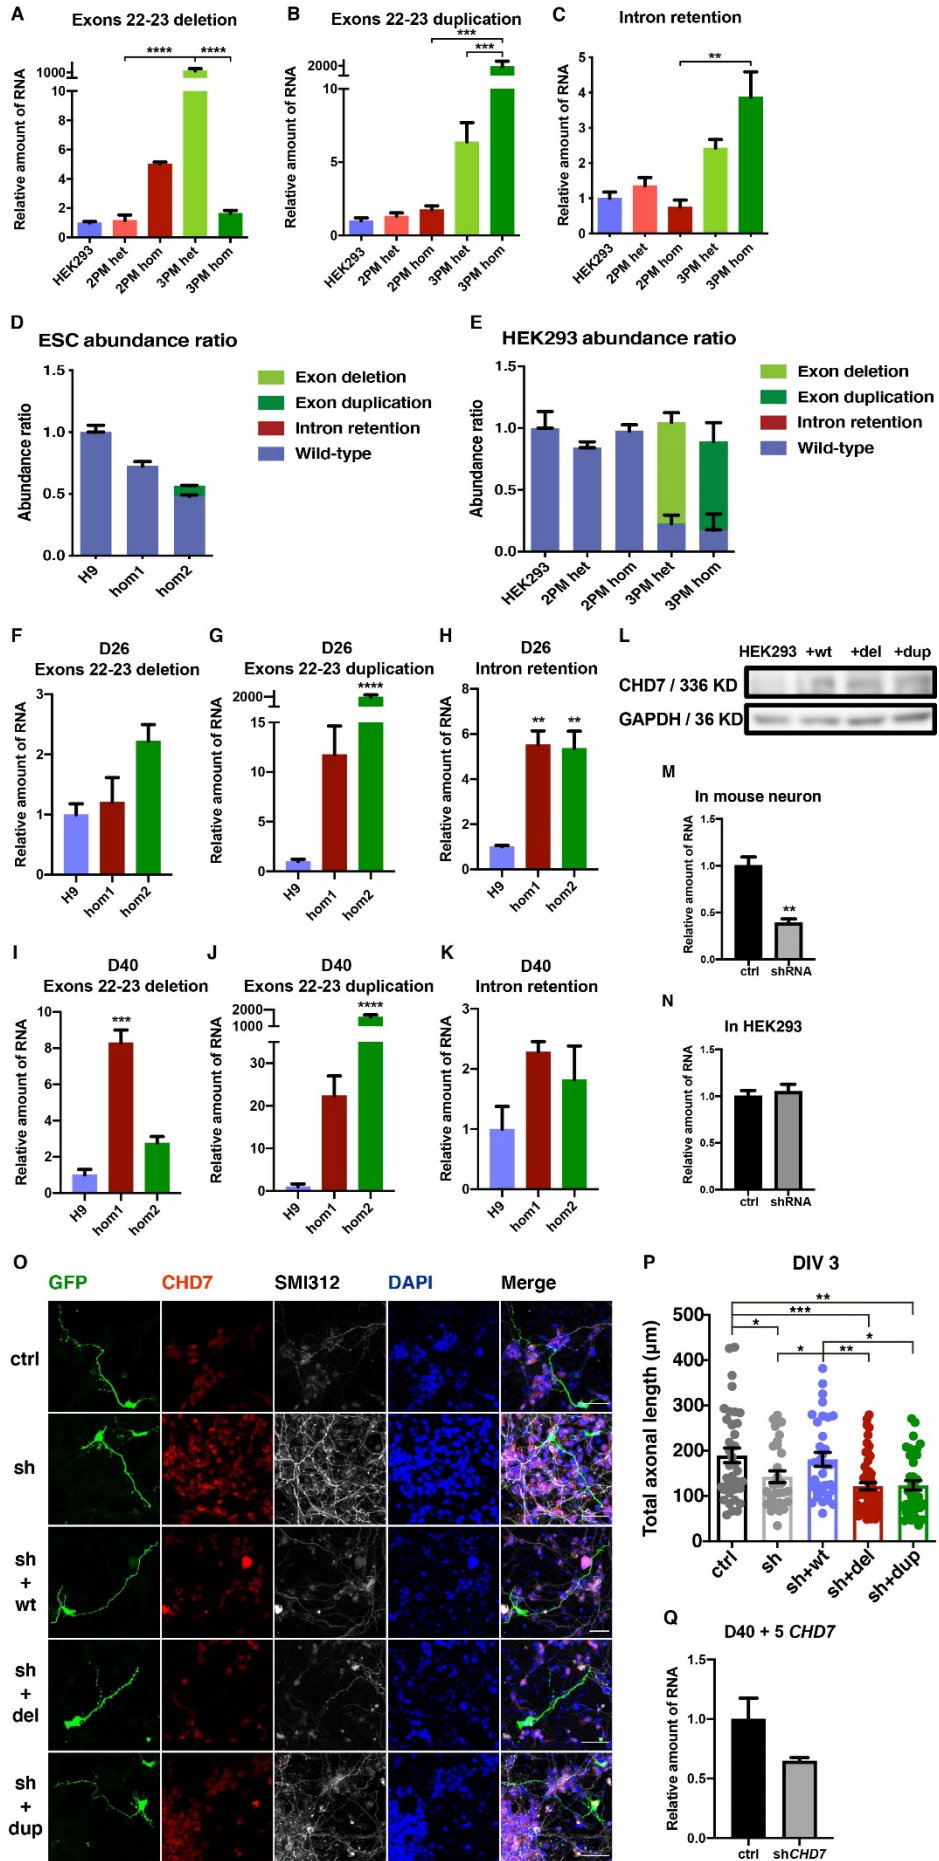

**Fig. S5** Expression and function of abnormal transcripts. **A–C** mRNA levels assessed by RT-qPCR for transcripts with exons 22–23 deletion (**A**), exons 22–23 duplication (**B**), and intron retention (**C**) in point mutant HEK293 cells, grouped into HEK293 cell controls, synonymous mutation controls (2PM het and 2PM hom), and intronic mutations (3PM het and 3PM hom). Values represent the mean  $\pm$  SEM ( $n = 3$ ,  $*P < 0.05$ ,  $**P < 0.01$ ,  $***P < 0.001$ ,  $****P < 0.0001$ ; one-way ANOVA). **D, E** Relative abundance of each transcript in hESCs (**D**) and HEK293 cells (**E**). **F–K** mRNA levels assessed by RT-qPCR for transcripts in differentiated NPCs on D26 (**D–F**) and neurons on D40 (**G–I**). Values represent the mean  $\pm$  SEM ( $n = 3$ ,  $*P < 0.05$ ,  $**P < 0.01$ ,  $***P < 0.001$ ,  $****P < 0.0001$ ; one-way ANOVA). **L** Western blots of CHD7 protein expression using HEK293 cells transfected with wild-type transcript, exons 22–23 deletion transcript, and exons 22–23 duplication transcript. **M, N** mRNA levels assessed by RT-qPCR for CHD7 in E14.5 mouse primary cortical neurons (**K**) and HEK293 cells after transfection with shRNA for mouse *Chd7* for 4 days (**L**). Values represent the mean  $\pm$  SEM ( $n = 3$ ,  $*P < 0.05$ ,  $**P < 0.01$ ,  $***P < 0.001$ ,  $****P < 0.0001$ ; *t*-test). **O** Representative images of E14.5 mouse primary cortical neurons transfected with GFP, together with shRNA for *DsRed* as control or shRNA for mouse *Chd7*, and with human *CHD7* transcript wt, del or dup at DIV 3, co-immunostained for GFP, CHD7, SMI312, and DAPI (scale bars, 50  $\mu$ m). **P** Quantification of total axonal length in DIV 3 neurons (at least 30 neurons were analyzed for each group;  $*P < 0.05$ ,  $**P < 0.01$ ,  $***P < 0.001$ ,  $****P < 0.0001$ ; one-way ANOVA). **Q** mRNA levels assessed by RT-qPCR for *CHD7* in differentiated neurons after transfection with shRNA for *CHD7* at D40 for 5 days. Values represent the mean  $\pm$  SEM ( $n = 8$ ,  $*P < 0.05$ ,  $**P < 0.01$ ,  $***P < 0.001$ ,  $****P < 0.0001$ ; *t*-test).
